# Supplementary material for: FOXP3+ Regulatory T Cells in Hepatic Fibrosis and Splenomegaly Caused by Schistosoma japonicum: The Spleen May Be a Major Source of Tregs in Subjects with Splenomegaly
Source: PubMed Central journal article supplement (PMC4701139; doi:10.1371/journal.pntd.0004306), 2016-01-05

Fig. 1S

Gated on CD4+ T cells

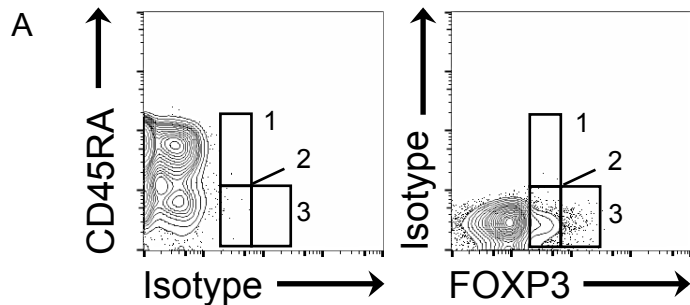

1. CD45RA<sup>+</sup>FOXP3<sup>low</sup>CD4<sup>+</sup>cells (Naïve Tregs)
2. CD45RA<sup>-</sup>FOXP3<sup>low</sup> CD4<sup>+</sup>cells
3. CD45RA<sup>-</sup>FOXP3<sup>high</sup> CD4<sup>+</sup>cells (eTregs)

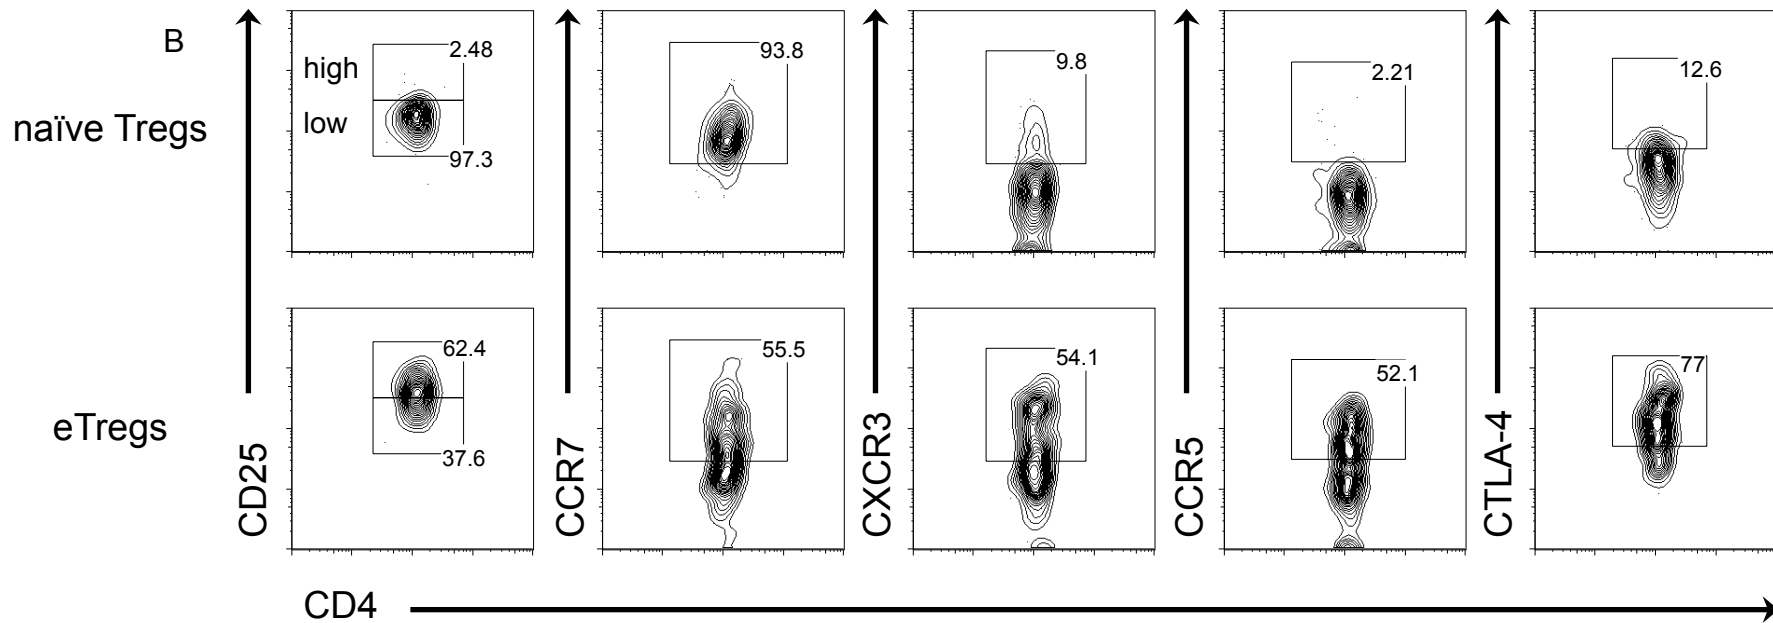

Supplement: pntd.0004306.s001.pdf [file pntd.0004306.s001.pdf]
